# Supplementary material
Source: PubMed Central journal article supplement (PMC3075125)
Supplement: supp_japplphysiol.00800.2010_figS1.pdf [file supp_japplphysiol.00800.2010_figS1.pdf]

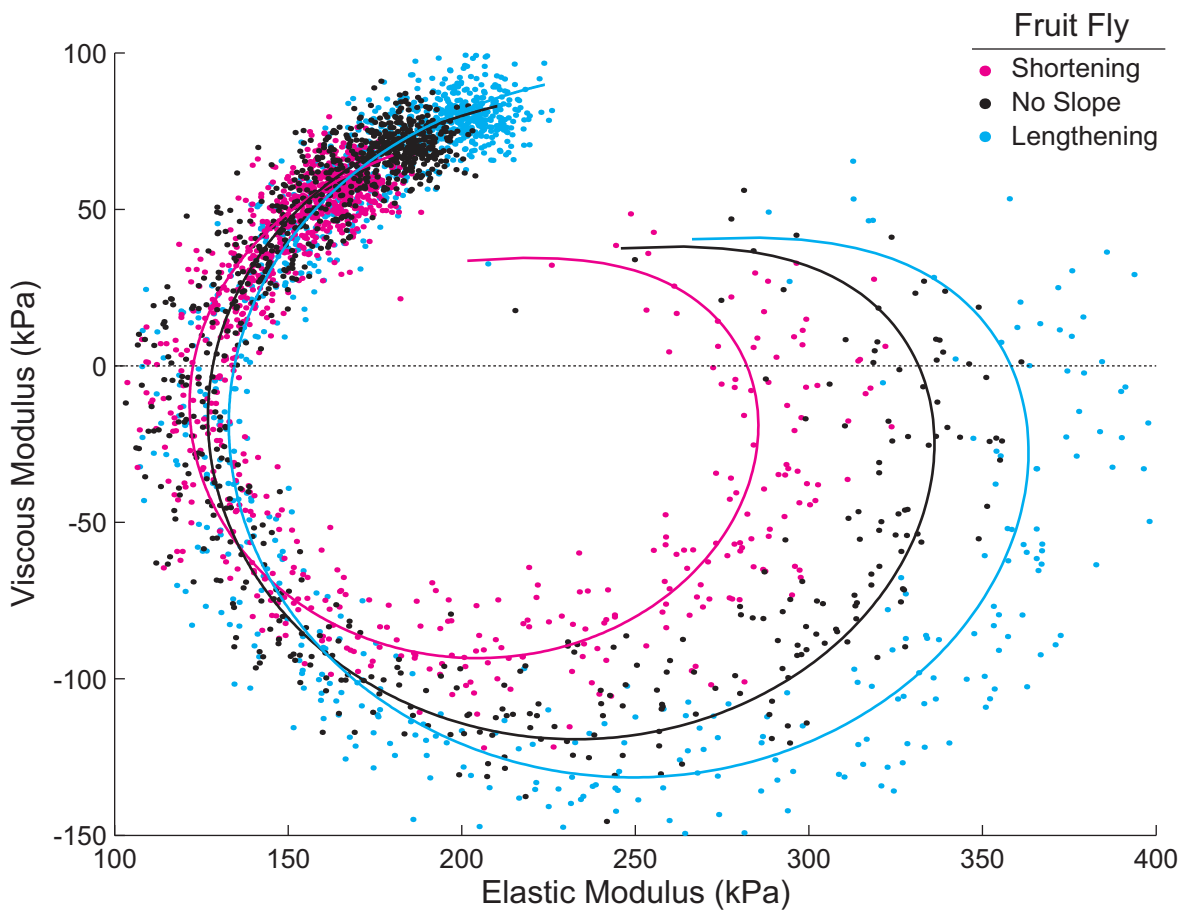

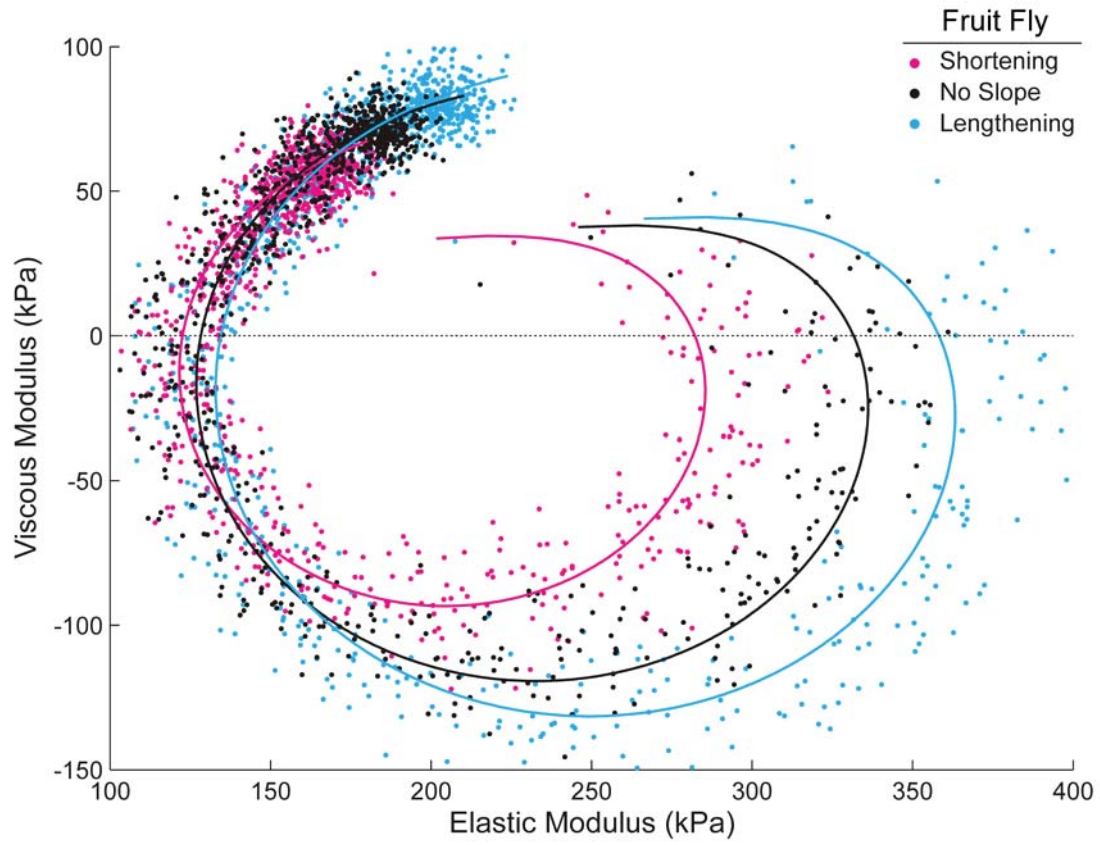

**Supplemental Figure 1:** Data from Fig. 6 are plotted here as viscous versus elastic moduli. Solid lines show curve-fits to Eq. 1 for each condition, depicting average fits that correspond to parameter values plotted in Fig. 7 A-D.
